# Supplementary figures and images for: Pressure-induced isostructural phase transition in CaB4
Source: Royal Society of Chemistry journal article supplement (doi:10.1039/c4ra04102j), 2014-08-19

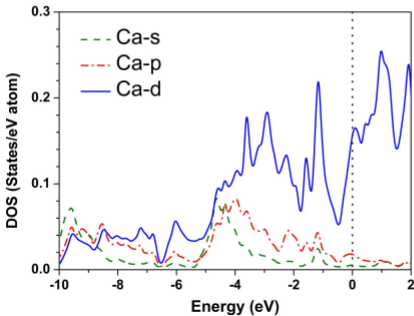

Supplement: c4ra04102j2.pdf [file c4ra04102j2.pdf]
